# Supplementary material for: Intranasal Low-Dose Naltrexone Against Opioid Side Effects: A Preclinical Study
Source: Front Pharmacol. 2020 Sep 18;11:576624. doi: 10.3389/fphar.2020.576624 (PMC7531600; doi:10.3389/fphar.2020.576624)
Supplement: Supplementary file 1 [file DataSheet_1.docx]

Supplementary Material
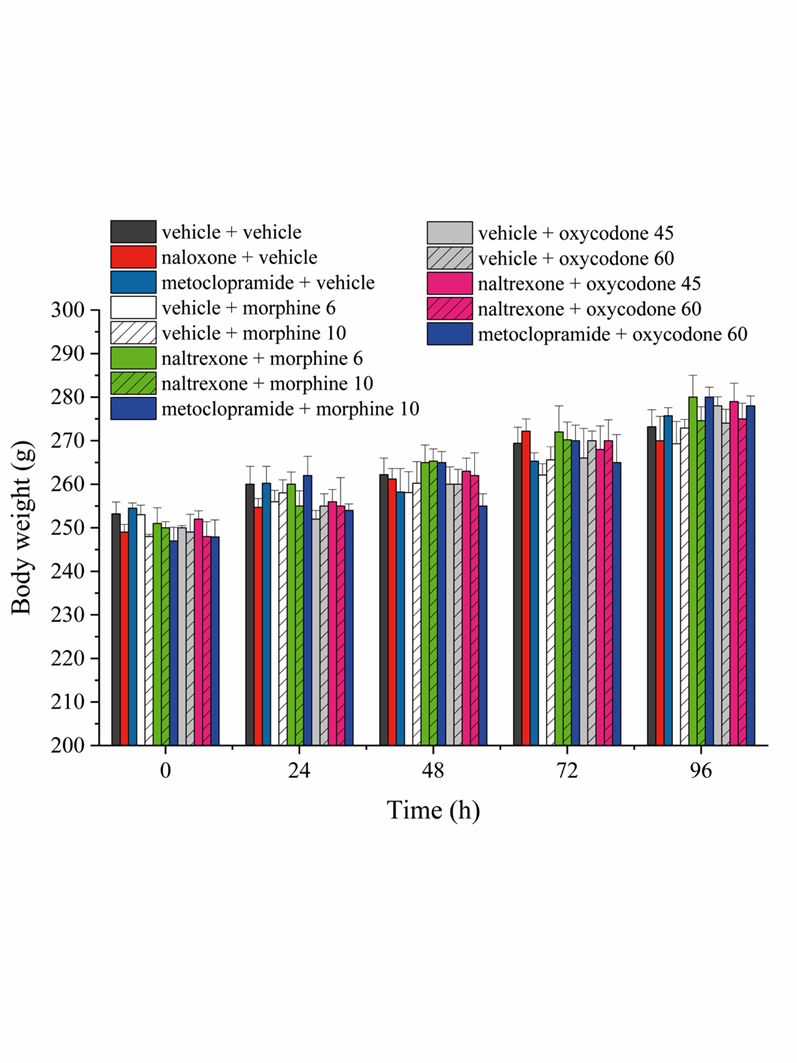


**Supplementary Figure 1.** Effect of intranasal administration of naltrexone on body weight of morphine and oxycodone treated rats. Animal’s body weight was measured up to 96 h after morphine (6 - 10 mg kg-1) or oxycodone (45 - 60 mg kg-1) administration. Metoclopramide (5 mg kg-1) or naltrexone (1 g) were administered 30 min before the opioids. Control animals were treated with vehicles. Each value represents the mean of 10 rats per group, performed in two different experimental set.
